# Supplementary material for: Effect of Co-doping on the electrochromic performance of hexagonal phase WO3 nanorods
Source: Royal Society of Chemistry journal article supplement (doi:10.1039/d4dt02319f), 2024-01-01
Supplement: d4dt02319f1.pdf [file d4dt02319f1.pdf]

### Supplementary Information

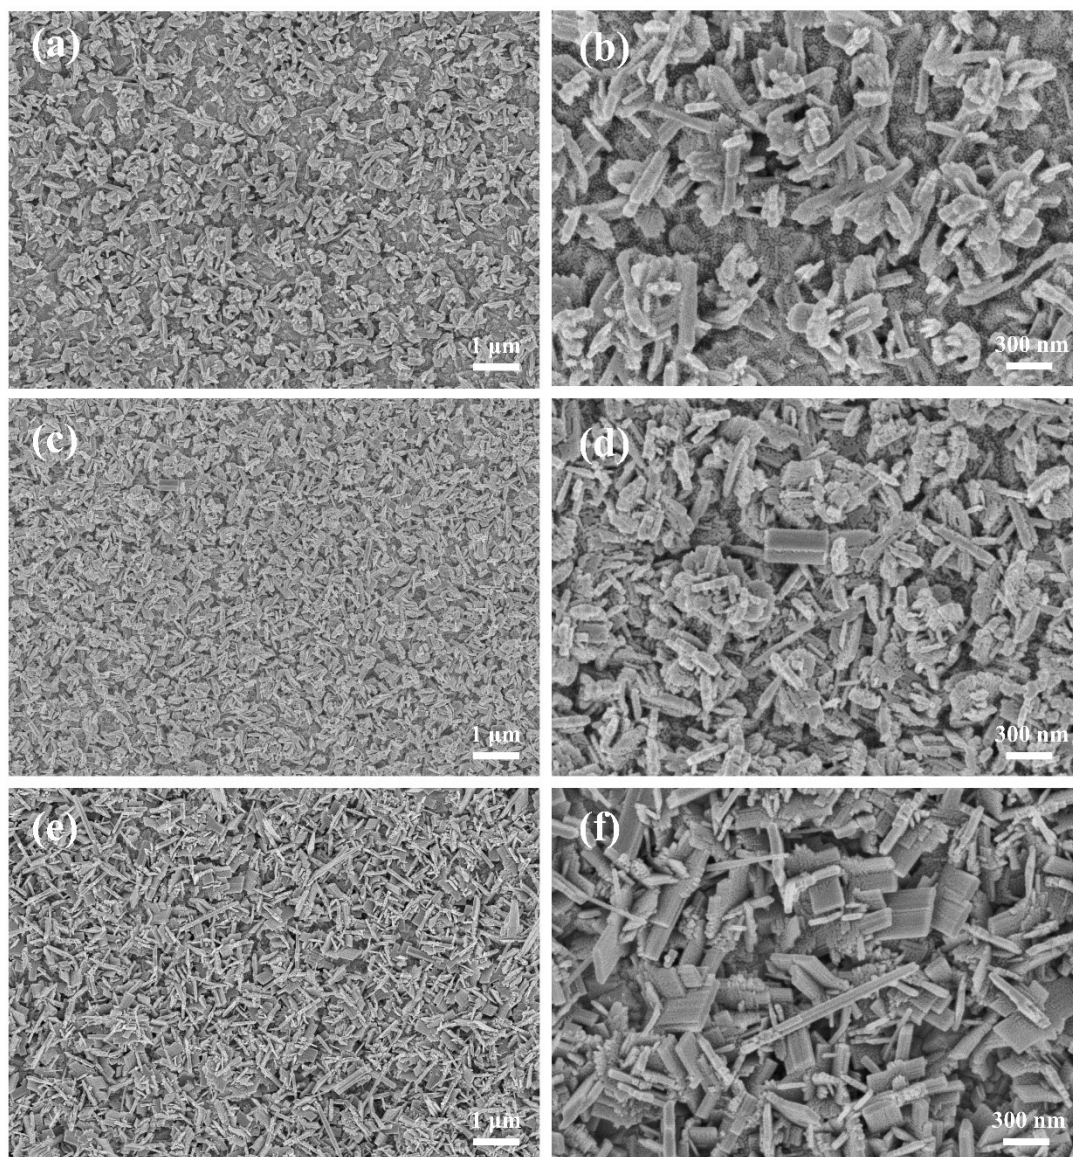

**Fig. S1** SEM images of (a, b) WCo-0.5%, (c, d) WCo-1.0%, (e, f) WCo-2.0% with different magnifications.

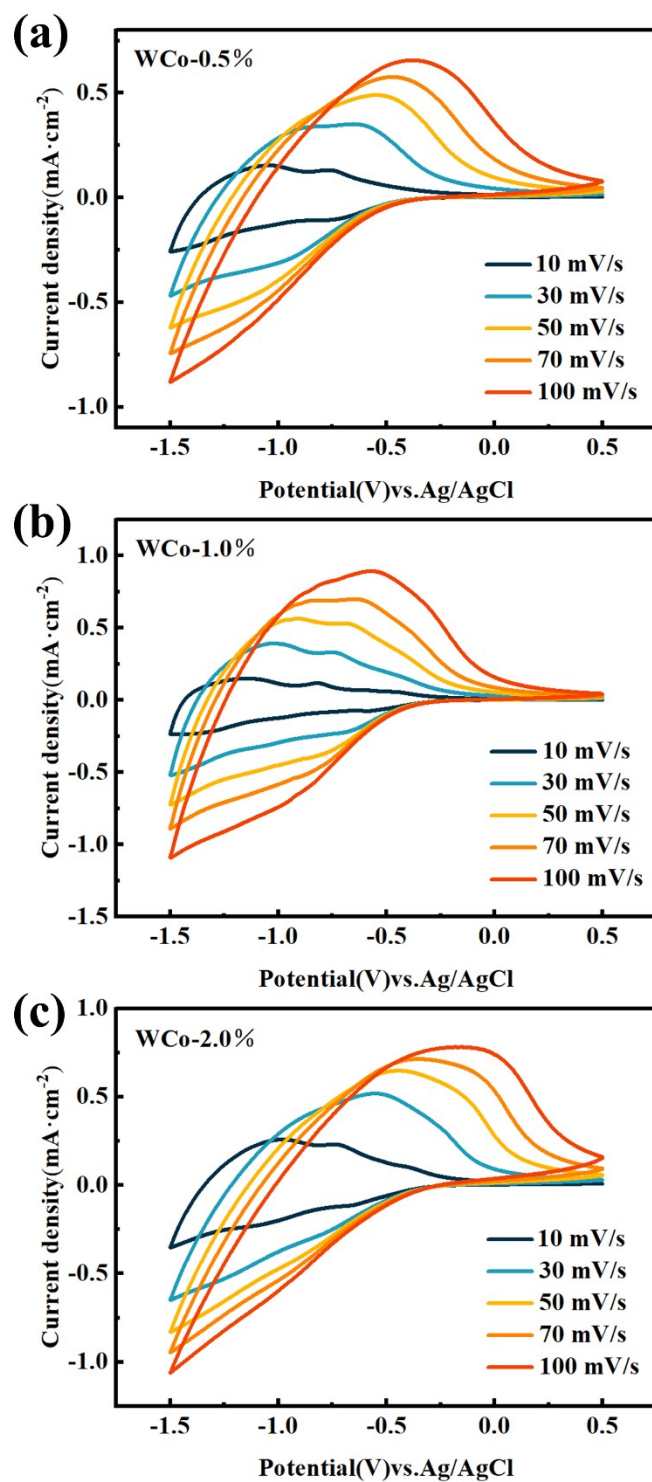

**Fig. S2** Cyclic voltammetry (CV) curves of (a) WCo-0.5%, (b) WCo-1.0% and (c) WCo-2.0% films at different scan rates between -1.5 V and +0.5 V.

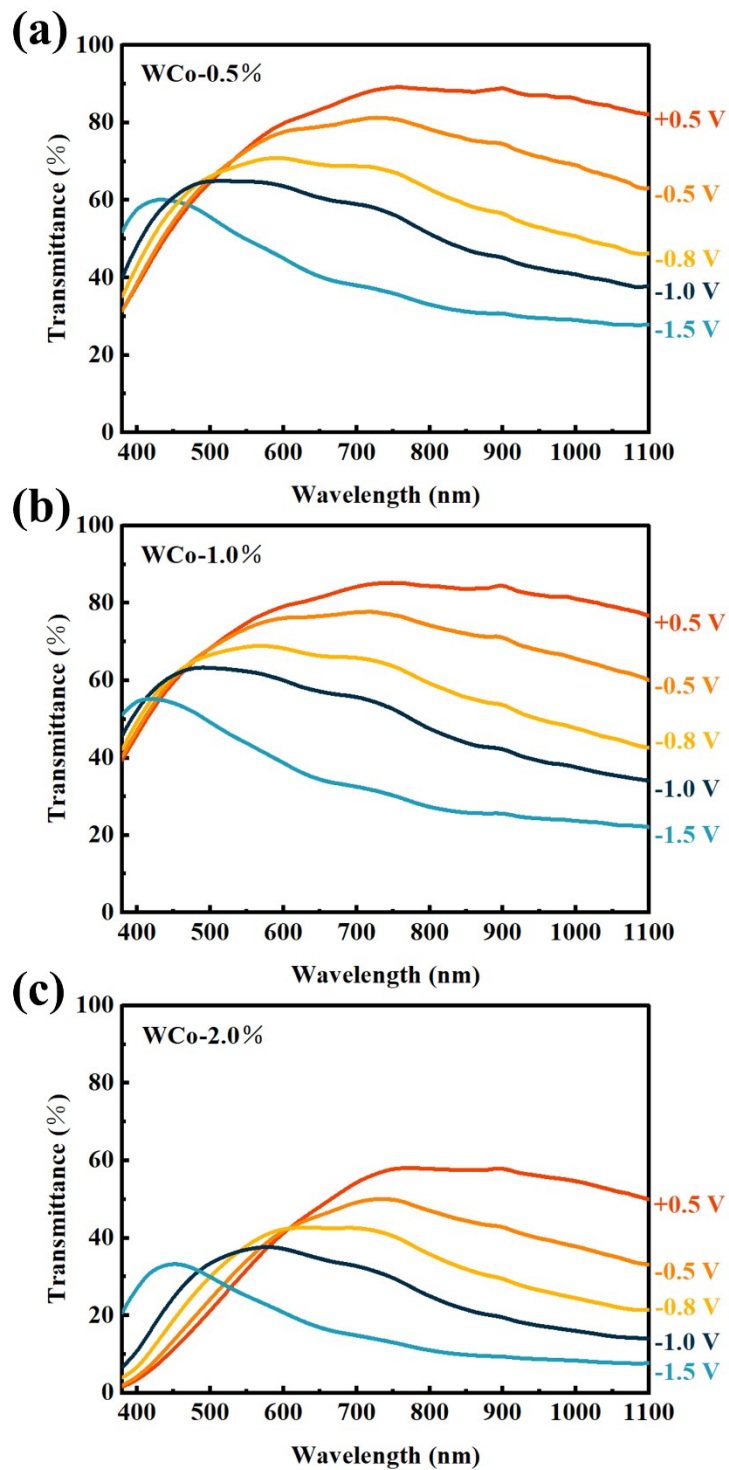

**Fig. S3** Transmission spectra of (a) WCo-0.5%, (b) WCo-1.0% and (c) WCo-2.0% films at different applied potentials (vs. Ag/AgCl) for 60 s in the bleached and colored states.

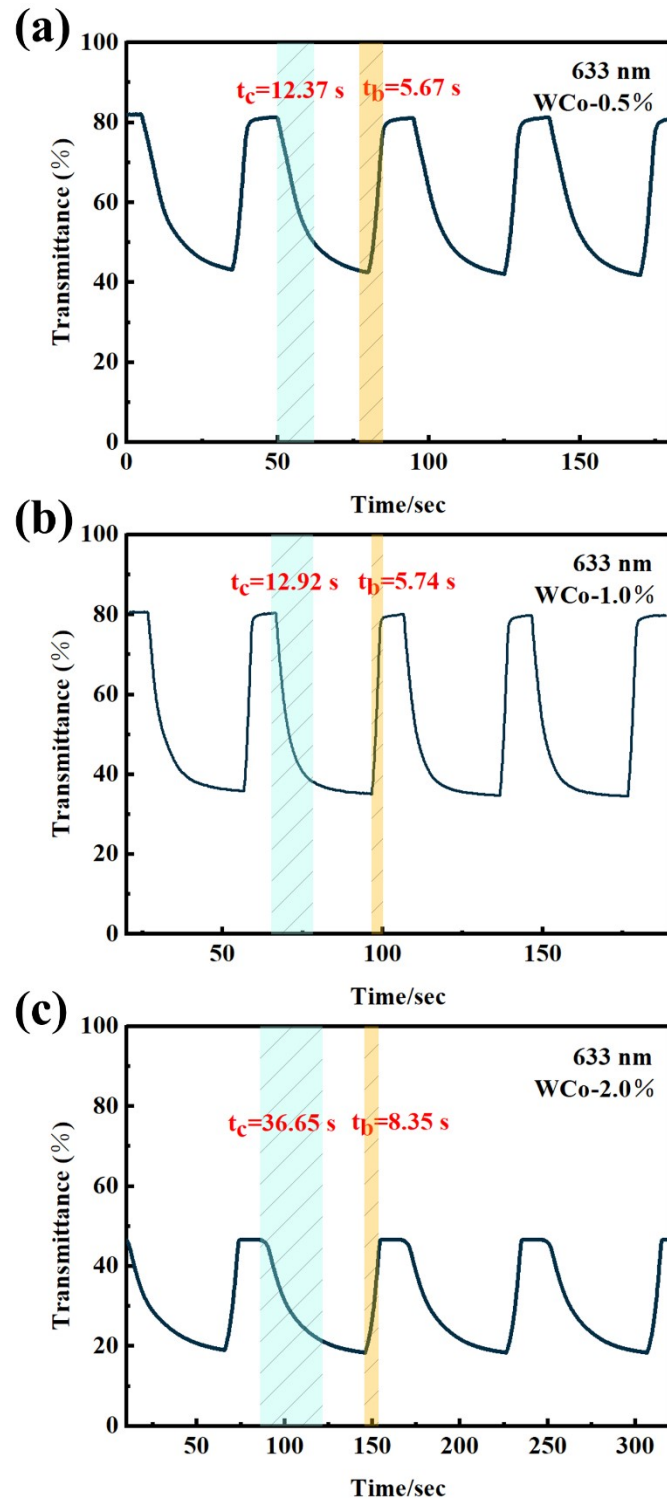

**Fig. S4** In-situ response curves of (a) WCo-0.5%, (b) WCo-1.0% and (c) WCo-2.0% films at a wavelength of 633 nm.

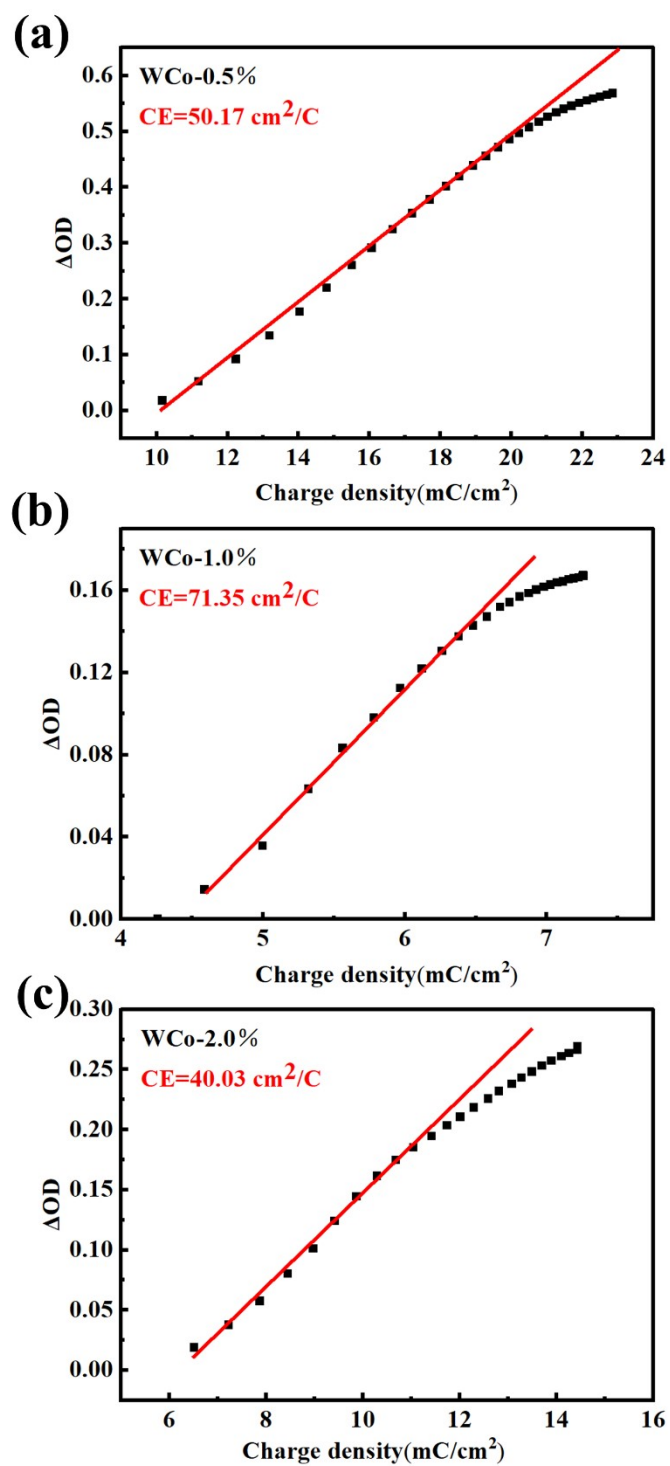

**Fig. S5** (a) WCo-0.5%, (b) WCo-1.0% and (c) WCo-2.0% films at 633 nm optical density ( $\Delta OD$ ) vs. charge density ( $\Delta Q/S$ ) curves at 633 nm.

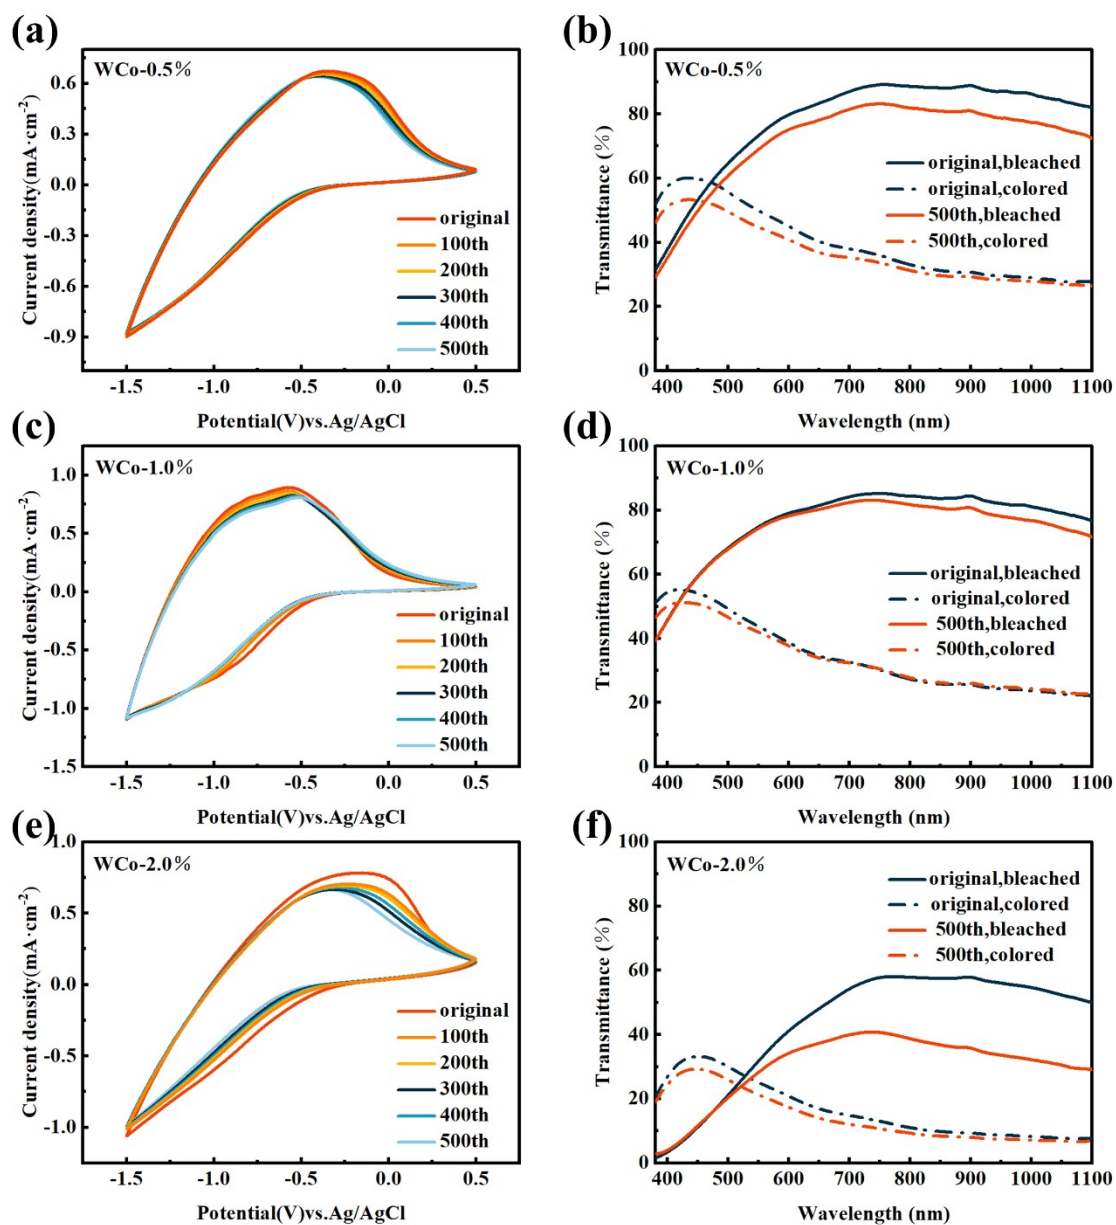

**Fig. S6** Cyclic voltammetry curves and transmittance spectra of (a) WCo-0.5%, (b) WCo-1.0% and (c) WCo-2.0% films in the original state and after 500 cycles.
